# Supplementary material for: Trachycladindoles A–G: cytotoxic heterocycles from an Australian marine sponge, Trachycladus laevispirulifer
Source: Royal Society of Chemistry journal article supplement (doi:10.1039/b803455a), 2008-01-01

## Supporting Information

|                                                                                                |    |
|------------------------------------------------------------------------------------------------|----|
| <b>Table S1</b> NMR (600MHz, $d_6$ -DMSO) data for trachycladindole A ( <b>1</b> ).....        | 2  |
| <b>Table S2</b> NMR (600MHz, $CD_3OD$ ) data for trachycladindole B ( <b>2</b> ).....          | 3  |
| <b>Table S3</b> NMR (600MHz, $CD_3OD$ ) data for trachycladindole C ( <b>3</b> ).....          | 4  |
| <b>Table S4</b> NMR (600MHz, $CD_3OD$ ) data for trachycladindole D ( <b>4</b> ).....          | 5  |
| <b>Table S5</b> NMR (600MHz, $CD_3OD$ ) data for trachycladindole E ( <b>5</b> ).....          | 6  |
| <b>Table S6</b> NMR (600MHz, $CD_3OD$ ) data for trachycladindole F ( <b>6</b> ).....          | 7  |
| <b>Table S7a</b> NMR (600MHz, $CD_3OD$ ) data for trachycladindole G ( <b>7</b> ).....         | 8  |
| <b>Table S7b</b> $^1H$ NMR (600MHz, $d_6$ -DMSO) data for trachycladindole G ( <b>7</b> )..... | 8  |
| <b>Figure S1</b> $^1H$ NMR (600MHz, $CD_3OD$ ) for trachycladindole A ( <b>1</b> ).....        | 9  |
| <b>Figure S2</b> $^1H$ NMR (600MHz, $CD_3OD$ ) for trachycladindole B ( <b>2</b> ).....        | 10 |
| <b>Figure S3</b> $^1H$ NMR (600MHz, $CD_3OD$ ) for trachycladindole C ( <b>3</b> ).....        | 11 |
| <b>Figure S4</b> $^1H$ NMR (600MHz, $CD_3OD$ ) for trachycladindole D ( <b>4</b> ).....        | 12 |
| <b>Figure S5</b> $^1H$ NMR (600MHz, $CD_3OD$ ) for trachycladindole E ( <b>5</b> ).....        | 13 |
| <b>Figure S6</b> $^1H$ NMR (600MHz, $CD_3OD$ ) for trachycladindole F ( <b>6</b> ).....        | 14 |
| <b>Figure S7</b> $^1H$ NMR (600MHz, $CD_3OD$ ) for trachycladindole G ( <b>7</b> ).....        | 15 |

**Table S1** NMR (600MHz, *d*<sub>6</sub>-DMSO) data for trachycladindole A (**1**)

| <b>1</b>             |                                        |                                  |           |                                          |                    |
|----------------------|----------------------------------------|----------------------------------|-----------|------------------------------------------|--------------------|
| #                    | $\delta_{\text{H}}$ (m, <i>J</i> (Hz)) | $\delta_{\text{C}}$ <sup>B</sup> | COSY      | gHMBC ( <sup>1</sup> H- <sup>13</sup> C) | NOESY              |
| N1-H                 | <sup>A</sup>                           |                                  |           |                                          |                    |
| 2                    |                                        | 137.1 <sup>C</sup>               |           |                                          |                    |
| C2-CO <sub>2</sub> H | <sup>A</sup>                           | 165.4                            |           |                                          |                    |
| 3                    |                                        | 110.6                            |           |                                          |                    |
| 3a                   |                                        | 126.8                            |           |                                          |                    |
| 4                    | 7.53 (brs)                             | 121.2                            |           | C-7                                      | N12-Me, H-9a, H-9b |
| 5                    |                                        | 111.7                            |           |                                          |                    |
| 6                    | 7.24 (dd, 8.5, 1.5)                    | 124.8                            | H-7       | C-7a, C-7, C-5, C-4                      |                    |
| 7                    | 7.38 (d, 8.6)                          | 114.6                            | H-6       | C-6, C-5, C-4, C-3a                      |                    |
| 7a                   |                                        | 133.6                            |           |                                          |                    |
| 8                    | 6.44 (brs)                             | 56.4                             | H-9a      |                                          | N12-Me, H-9a       |
| 9a                   | 3.98 (dd, 9.8, 9.8)                    | 47.1                             | H-8, H-9b | C-11, C-8, C-3                           | H-8, H-4           |
| 9b                   | 3.57 (brs)                             |                                  | H-9a      |                                          | H-4                |
| N10-H                | <sup>A</sup>                           |                                  |           |                                          |                    |
| 11                   |                                        | 159.2                            |           |                                          |                    |
| N12-Me               | 2.69 (s)                               | 29.2                             |           | C-11, C-8                                | H-8, H-4           |

<sup>A</sup> not observed, <sup>B</sup> <sup>13</sup>C NMR assignments supported by HSQC experiments. <sup>C</sup> Assignment *tentative*.

**Table S2** NMR (600MHz, CD<sub>3</sub>OD) data for trachycladindole B (**2**)

| <b>2</b>             |                                        |                                  |      |                                          |                     |
|----------------------|----------------------------------------|----------------------------------|------|------------------------------------------|---------------------|
| #                    | $\delta_{\text{H}}$ (m, <i>J</i> (Hz)) | $\delta_{\text{C}}$ <sup>B</sup> | COSY | gHMBC ( <sup>1</sup> H- <sup>13</sup> C) | NOESY               |
| N1-H                 | <sup>A</sup>                           |                                  |      |                                          |                     |
| 2                    |                                        | <sup>A</sup>                     |      |                                          |                     |
| C2-CO <sub>2</sub> H | <sup>A</sup>                           | 168.5                            |      |                                          |                     |
| 3                    |                                        | 111.9                            |      |                                          |                     |
| 3a                   |                                        | 128.6                            |      |                                          |                     |
| 4                    | 7.56 (brs)                             | 122.9                            |      |                                          | N12-Me, N10-Me, H9b |
| 5                    |                                        | 114.2                            |      |                                          |                     |
| 6                    | 7.30 (dd, 8.7, 1.8)                    | 127.4                            | H-7  | C-7a, C-5, C-4                           |                     |
| 7                    | 7.39 (d, 8.7)                          | 115.5                            | H-6  | C-5, C-4, C-3a                           |                     |
| 7a                   |                                        | 135.2                            |      |                                          |                     |
| 8                    | 6.25 (brs)                             | 57.1                             |      |                                          | H-9a                |
| 9a                   | 4.06 (dd, 9.9, 9.9)                    |                                  | H-9b | C-11, C-8, C-3                           | H-8                 |
| 9b                   | 3.71 (brm)                             | 55.9                             | H-9a |                                          | H-4                 |
| N10-Me               | 3.11                                   | 32.5                             |      | C-9                                      | H-4                 |
| 11                   |                                        | 159.8                            |      |                                          |                     |
| N12-Me               | 2.75                                   | 30.6                             |      | C-8                                      | H-4                 |

<sup>A</sup> not observed, <sup>B</sup> <sup>13</sup>C NMR assignments supported by HSQC experiments.

**Table S3** NMR (600MHz, CD<sub>3</sub>OD) data for trachycladindole C (**3**)

| <b>3</b>             |                                 |                                  |            |                                          |                   |
|----------------------|---------------------------------|----------------------------------|------------|------------------------------------------|-------------------|
| #                    | $\delta_{\text{H}}$ (m, J (Hz)) | $\delta_{\text{C}}$ <sup>B</sup> | COSY       | gHMBC ( <sup>1</sup> H- <sup>13</sup> C) | NOESY             |
| N1-H                 | <sup>A</sup>                    |                                  |            |                                          |                   |
| 2                    |                                 | 135.2 <sup>C</sup>               |            |                                          |                   |
| C2-CO <sub>2</sub> H | <sup>A</sup>                    | 169.2                            |            |                                          |                   |
| 3                    |                                 | 112.9                            |            |                                          |                   |
| 3a                   |                                 | 121.2                            |            |                                          |                   |
| 4                    | 7.55 (s)                        | 124.2                            |            | C-7a, C-6, C-5                           | N12-Me, H-9b, H-8 |
| 5                    |                                 | 106.0                            |            |                                          |                   |
| 6                    |                                 | 152.3                            |            |                                          |                   |
| 7                    | 6.99 (s)                        | 99.2                             |            | C-7a, C-6, C-5, C-3a                     |                   |
| 7a                   |                                 | 137.5                            |            |                                          |                   |
| 8                    | 6.35 (brs)                      | 58.9                             | H-9a, H-9b |                                          | N12-Me, H-9a, H-4 |
| 9a                   | 4.04 (dd, 10.1, 10.1)           | 48.2                             | H-9b, H-8  | C-11, C-8, C-3                           | H-8               |
| 9b                   | 3.68 (brm)                      |                                  | H-9a, H-8  |                                          | H-4               |
| N10-H                | <sup>A</sup>                    |                                  |            |                                          |                   |
| 11                   |                                 | 160.3                            |            |                                          |                   |
| N12-Me               | 2.74                            | 29.7                             |            | C-11, C-8                                | H-8, H-4          |

<sup>A</sup> not observed, <sup>B</sup> <sup>13</sup>C NMR assignments supported by HSQC experiments. <sup>C</sup> Assignment *tentative*.

**Table S4** NMR (600MHz, CD<sub>3</sub>OD) data for trachycladindole D (**4**)

| <b>4</b>             |                                        |                                  |      |                                          |                           |
|----------------------|----------------------------------------|----------------------------------|------|------------------------------------------|---------------------------|
| #                    | $\delta_{\text{H}}$ (m, <i>J</i> (Hz)) | $\delta_{\text{C}}$ <sup>B</sup> | COSY | gHMBC ( <sup>1</sup> H- <sup>13</sup> C) | NOESY                     |
| N1-H                 | <sup>A</sup>                           |                                  |      |                                          |                           |
| 2                    |                                        | <sup>A</sup>                     |      |                                          |                           |
| C2-CO <sub>2</sub> H | <sup>A</sup>                           | 169.0                            |      |                                          |                           |
| 3                    |                                        | 112.2                            |      |                                          |                           |
| 3a                   |                                        | 121.3                            |      |                                          |                           |
| 4                    | 7.49 (brs)                             | 124.1                            |      |                                          | N12-Me, N10-Me, H-9b, H-8 |
| 5                    |                                        | 106.3 <sup>C</sup>               |      |                                          |                           |
| 6                    |                                        | 152.5 <sup>C</sup>               |      |                                          |                           |
| 7                    | 6.98 (s)                               | 99.4                             |      | C-5, C-3a                                |                           |
| 7a                   |                                        | 135.4 <sup>C</sup>               |      |                                          |                           |
| 8                    | 6.24 (brs)                             | 57.2                             |      |                                          | N12-Me, H-9a, H-4         |
| 9a                   | 4.03 (dd, 10.0, 10.0)                  | 55.9                             | H-9b | C-11, C-3                                | N12-Me, N10-Me, H-8       |
| 9b                   | 3.67 (brm)                             |                                  | H-9a |                                          | N12-Me, N10-Me, H-4       |
| N10-Me               | 3.10 (s)                               | 32.5                             |      | C-11, C-9                                | H-9a, H-9b, H-4           |
| 11                   |                                        | 159.7                            |      |                                          |                           |
| N12-Me               | 2.74 (s)                               | 30.5                             |      | C-11, C-8                                | H-8, H-4, H-9a, H-9b      |

<sup>A</sup> not observed, <sup>B</sup> <sup>13</sup>C NMR assignments supported by HSQC experiments. <sup>C</sup> Assignment *tentative*.

**Table S5** NMR (600MHz, CD<sub>3</sub>OD) data for trachycladindole E (**5**)

| <b>5</b>             |                                 |                                  |      |                                          |                          |
|----------------------|---------------------------------|----------------------------------|------|------------------------------------------|--------------------------|
| #                    | $\delta_{\text{H}}$ (m, J (Hz)) | $\delta_{\text{C}}$ <sup>B</sup> | COSY | gHMBC ( <sup>1</sup> H- <sup>13</sup> C) | NOESY                    |
| N1-H                 | A                               |                                  |      |                                          |                          |
| 2                    |                                 | A                                |      |                                          |                          |
| C2-CO <sub>2</sub> H | A                               | 168.2 <sup>C</sup>               |      |                                          |                          |
| 3                    |                                 | A                                |      |                                          |                          |
| 3a                   |                                 | 122.1 <sup>C</sup>               |      |                                          |                          |
| 4                    | A                               | A                                |      |                                          |                          |
| 5                    |                                 | 114.4 <sup>C</sup>               |      |                                          |                          |
| 6                    | 7.29 (dd, 8.7, 1.7)             | 127.4                            | H-7  | C-7a, C-5, C-3a                          | N10-Me, H-9              |
| 7                    | 7.39 (d, 8.7)                   | 115.5                            | H-6  | C-5                                      | H-9                      |
| 7a                   |                                 | 135.0 <sup>C</sup>               |      |                                          |                          |
| 8                    | 6.06 (brs)                      | 64.6                             |      |                                          |                          |
| 9                    | 5.29 (brs)                      | 86.4                             |      |                                          | N12-Me, N10-Me, H-7, H-6 |
| N10-Me               | 3.11 (s)                        | 29.3                             |      | C-11, C-9                                | H-9, H-6                 |
| 11                   |                                 | 158.0                            |      |                                          |                          |
| N12-Me               | 2.79 (s)                        | 30.2                             |      | C-11, C-8                                | H-9                      |

<sup>A</sup> not observed, <sup>B</sup> <sup>13</sup>C NMR assignments supported by HSQC experiments. <sup>C</sup> Assignment *tentative*.

**Table S6** NMR (600MHz, CD<sub>3</sub>OD) data for trachycladindole F (**6**)

| <b>6</b>             |                                 |                                  |      |                                          |                     |
|----------------------|---------------------------------|----------------------------------|------|------------------------------------------|---------------------|
| #                    | $\delta_{\text{H}}$ (m, J (Hz)) | $\delta_{\text{C}}$ <sup>B</sup> | COSY | gHMBC ( <sup>1</sup> H- <sup>13</sup> C) | NOESY               |
| N1-H                 | <sup>A</sup>                    |                                  |      |                                          |                     |
| 2                    |                                 | 137.5 <sup>C</sup>               |      |                                          |                     |
| C2-CO <sub>2</sub> H | <sup>A</sup>                    | 168.9 <sup>C</sup>               |      |                                          |                     |
| 3                    |                                 | 110.9 <sup>C</sup>               |      |                                          |                     |
| 3a                   |                                 | 120.9 <sup>C</sup>               |      |                                          |                     |
| 4                    | 7.25 (brs)                      | 123.3 <sup>C</sup>               |      |                                          |                     |
| 5                    |                                 | 106.9                            |      |                                          |                     |
| 6                    |                                 | 153.4                            |      |                                          |                     |
| 7                    | 6.95 (brs)                      | 99.1                             |      | C-7a, C-6, C-5, C-3a                     | N12-Me, N10-Me, H-9 |
| 7a                   |                                 | 137.4                            |      |                                          |                     |
| 8                    | 6.09 (brs)                      | 65.4                             |      |                                          |                     |
| 9                    | 5.28 (brs)                      | 89.9 <sup>C</sup>                |      |                                          | N12-Me, N10-Me, H-7 |
| N10-Me               | 3.13 (s)                        | 28.9                             |      | C-11                                     | H-9, H-7            |
| 11                   |                                 | 158.1                            |      |                                          |                     |
| N12-Me               | 2.80 (s)                        | 29.8                             |      | C-11, C-8                                | H-9, H-7            |

<sup>A</sup> not observed, <sup>B</sup> <sup>13</sup>C NMR assignments supported by HSQC experiments. <sup>C</sup> Assignment *tentative*.

**Table S7a** NMR (600MHz, CD<sub>3</sub>OD) data for trachycladindole G (7)

| 7                    |                                 |                                |               |                                          |              |
|----------------------|---------------------------------|--------------------------------|---------------|------------------------------------------|--------------|
| #                    | $\delta_{\text{H}}$ (m, J (Hz)) | $\delta_{\text{C}}^{\text{B}}$ | COSY          | gHMBC ( <sup>1</sup> H- <sup>13</sup> C) | NOESY        |
| N1-H                 | <sup>A</sup>                    |                                |               |                                          |              |
| 2                    |                                 | <sup>A</sup>                   |               |                                          |              |
| C2-CO <sub>2</sub> H | <sup>A</sup>                    | 169.2 <sup>C</sup>             |               |                                          |              |
| 3                    |                                 | 112.6                          |               |                                          |              |
| 3a                   |                                 | 126.5 <sup>C</sup>             |               |                                          |              |
| 4                    | 7.46 (d, 8.4)                   | 120.4 <sup>C</sup>             | H-7, H-6, H-5 | C-7a, C-6, C-5, C-3a                     | N12-Me, H-9b |
| 5                    | 7.05 (brdd, 7.5, 7.5)           | 121.2 <sup>C</sup>             | H-7, H-6, H-4 | C-7, C-6, C-3a                           |              |
| 6                    | 7.21 (brdd, 7.6, 7.6)           | 124.7 <sup>C</sup>             | H-7, H-5, H-4 | C-7a, C-4                                |              |
| 7                    | 7.46 (d, 8.4)                   | 113.8 <sup>C</sup>             | H-6, H-5, H-4 | C-7a, C-6, C-5, C-3a                     |              |
| 7a                   |                                 | 137.1 <sup>C</sup>             |               |                                          |              |
| 8                    | 6.42 (brs)                      | 59.1                           |               |                                          | N12-Me, H-9a |
| 9a                   | 4.06 (dd, 10.0, 10.0)           |                                | H-9b          | C-11, C-8, C-3                           | H-8          |
| 9b                   | 3.75 (dd, 8.8, 8.8)             | 48.4                           | H-9a          |                                          | H-4          |
| N10-H                | <sup>A</sup>                    |                                |               |                                          |              |
| 11                   |                                 | 160.3                          |               |                                          |              |
| N12-Me               | 2.73 (s)                        | 29.6                           |               | C-11, C-8                                | H-8, H-4     |

<sup>A</sup> not observed, <sup>B</sup> <sup>13</sup>C NMR assignments supported by HSQC experiments. <sup>C</sup> Assignment *tentative*.

**Table S7b** <sup>1</sup>H NMR (600MHz, *d*<sub>6</sub>-DMSO) data for trachycladindole G (7)

| 7                    |                                 |
|----------------------|---------------------------------|
| #                    | $\delta_{\text{H}}$ (m, J (Hz)) |
| N1-H                 | <sup>A</sup>                    |
| 2                    |                                 |
| C2-CO <sub>2</sub> H | <sup>A</sup>                    |
| 3                    |                                 |
| 3a                   |                                 |
| 4                    | 7.34 (brd, 5.9)                 |
| 5                    | 6.95 (dd, 7.5, 7.5)             |
| 6                    | 7.08 (dd, 7.5, 7.5)             |
| 7                    | 7.37 (d, 8.2)                   |
| 7a                   |                                 |
| 8                    | 6.53 (brs)                      |
| 9a                   | 3.91 (brm) <sup>C</sup>         |
| 9b                   | 3.57 (brm) <sup>C</sup>         |
| N10-H                | <sup>A</sup>                    |
| 11                   |                                 |
| N12-Me               | 2.64 (s)                        |

<sup>A</sup> not observed, <sup>C</sup> Assignment *tentative*.



Figure S1  $^1\text{H}$  NMR (600MHz,  $\text{CD}_3\text{OD}$ ) for trachycladindole A (**1**)

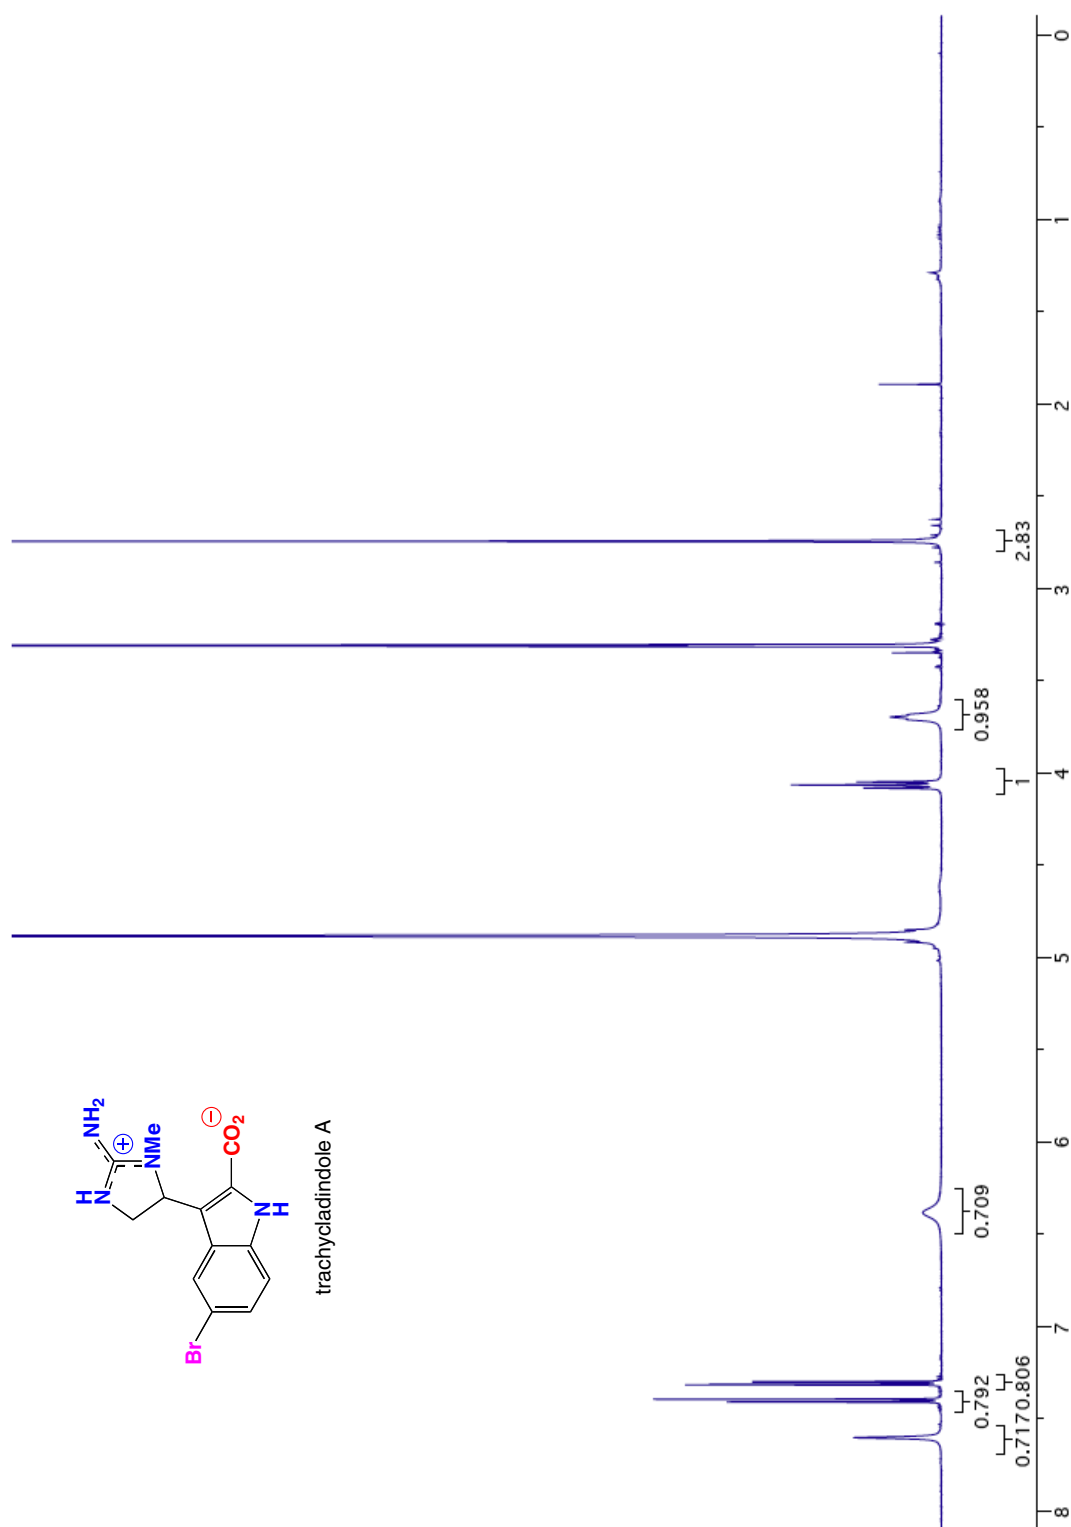

Figure S2  $^1\text{H}$  NMR (600MHz,  $\text{CD}_3\text{OD}$ ) for trachycladindole B (2)

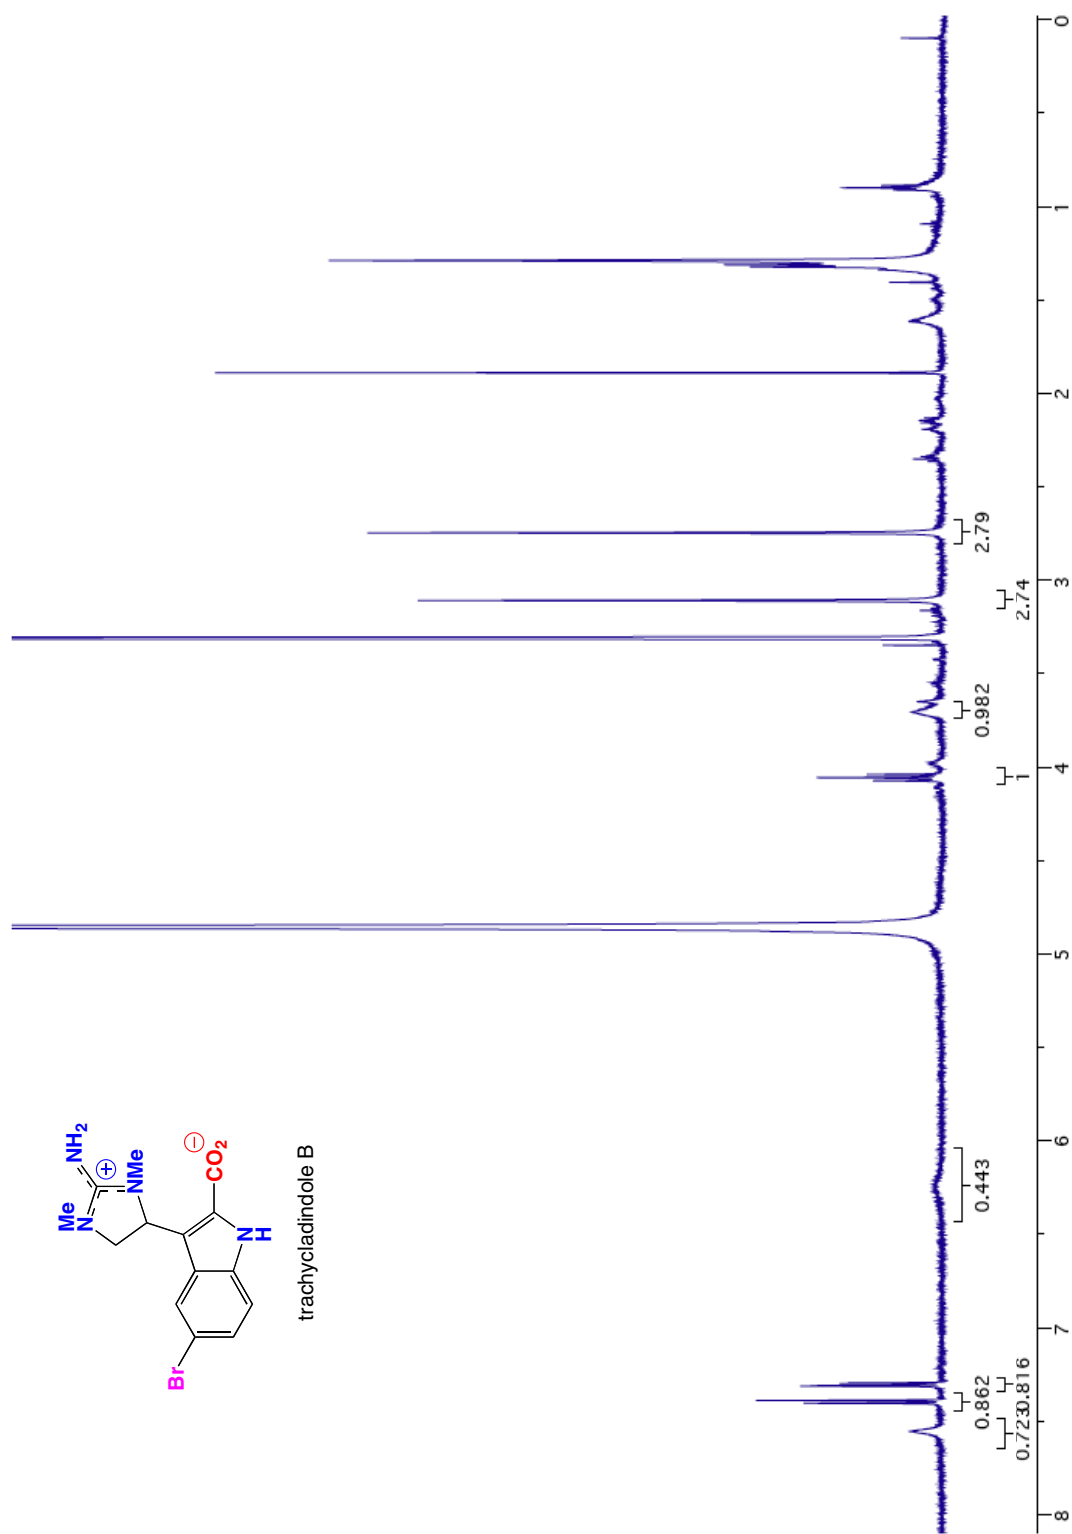

Figure S3  $^1\text{H}$  NMR (600MHz,  $\text{CD}_3\text{OD}$ ) for trachycladindole C (**3**)

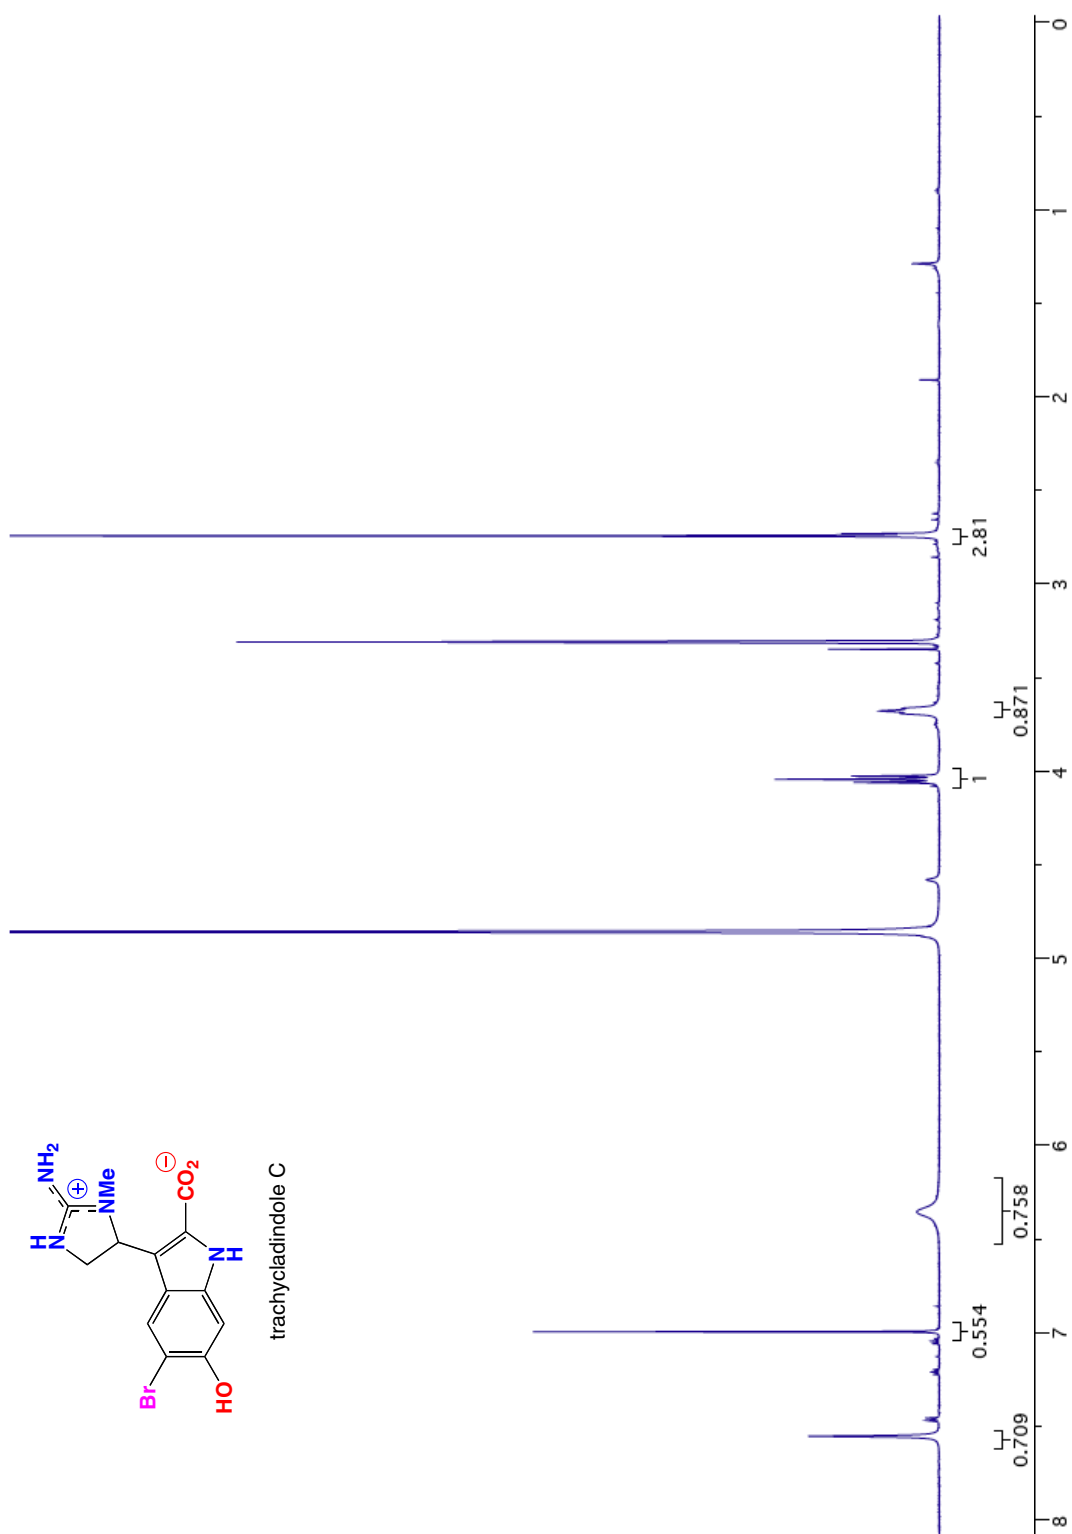

Figure S4  $^1\text{H}$  NMR (600MHz,  $\text{CD}_3\text{OD}$ ) for trachycladindole D (4)

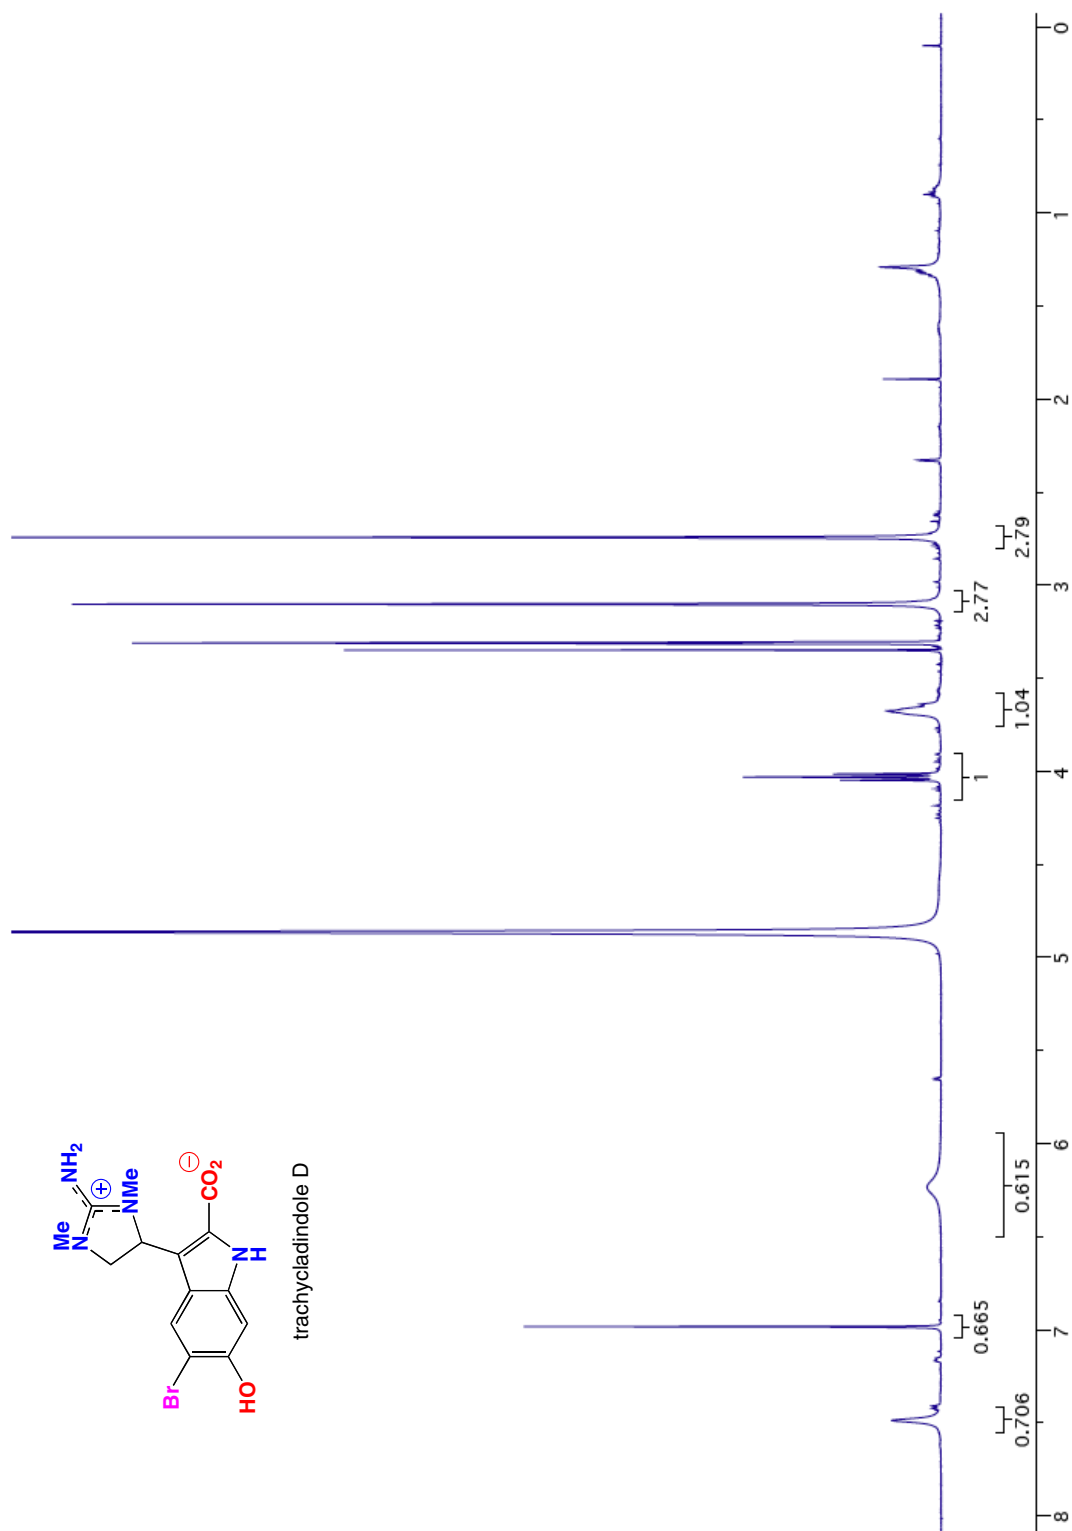

Figure S5 <sup>1</sup>H NMR (600MHz, CD<sub>3</sub>OD) for trachycladindole E (5)

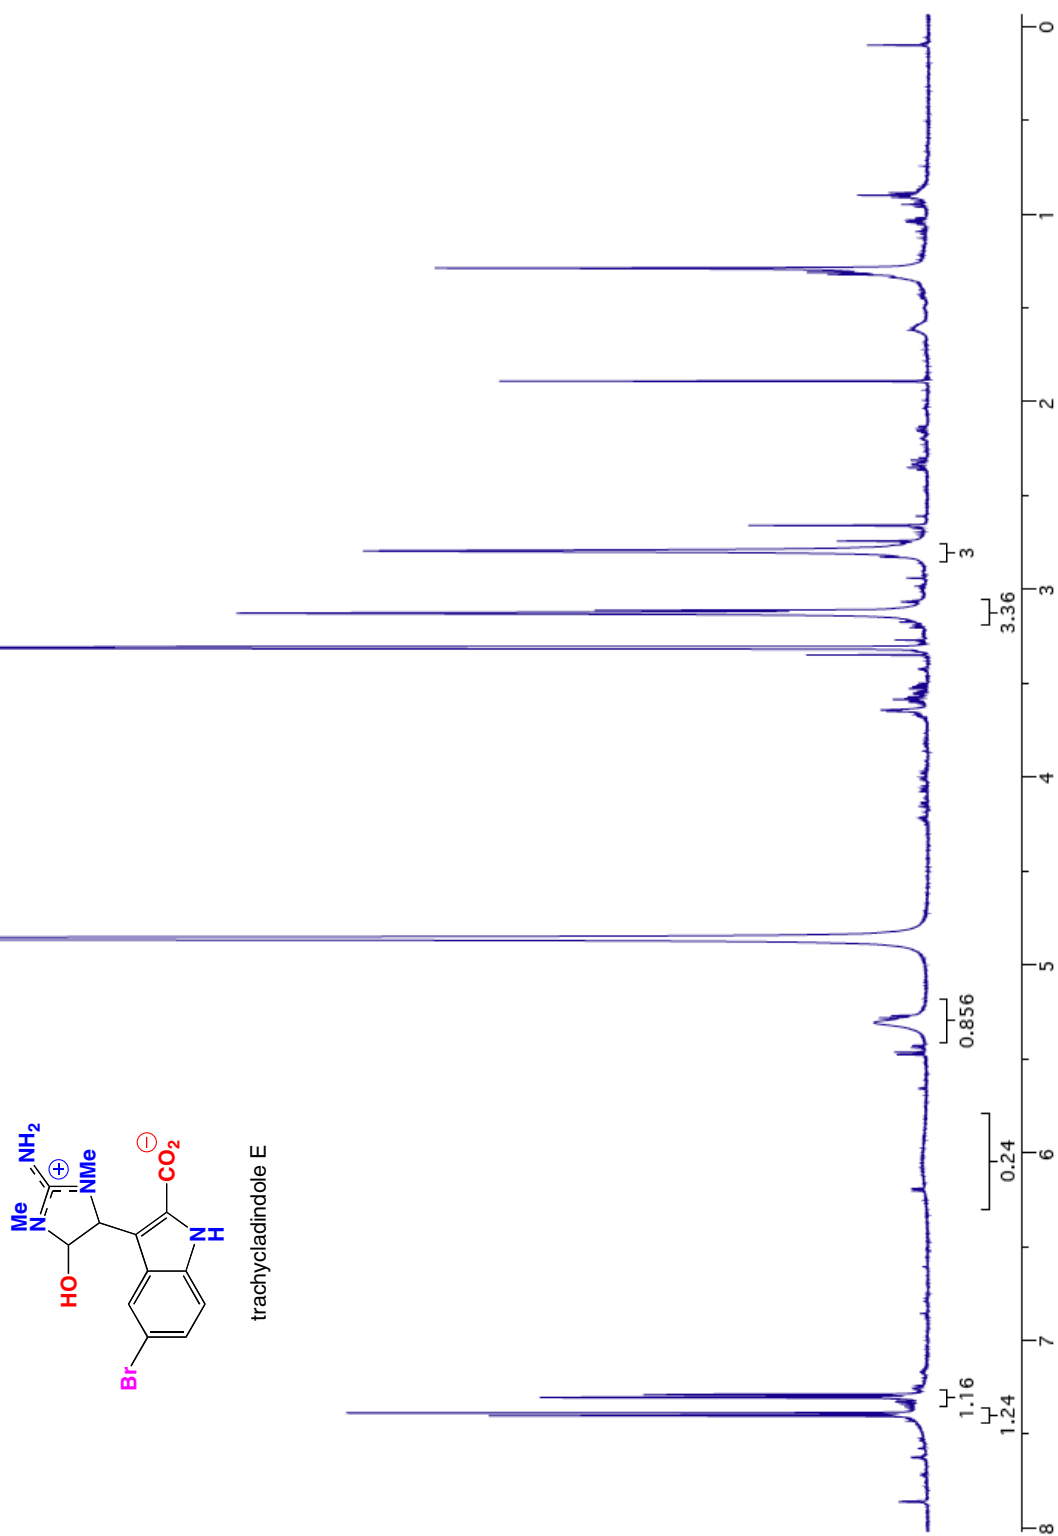

Figure S6  $^1\text{H}$  NMR (600MHz,  $\text{CD}_3\text{OD}$ ) for trachycladindole F (6)

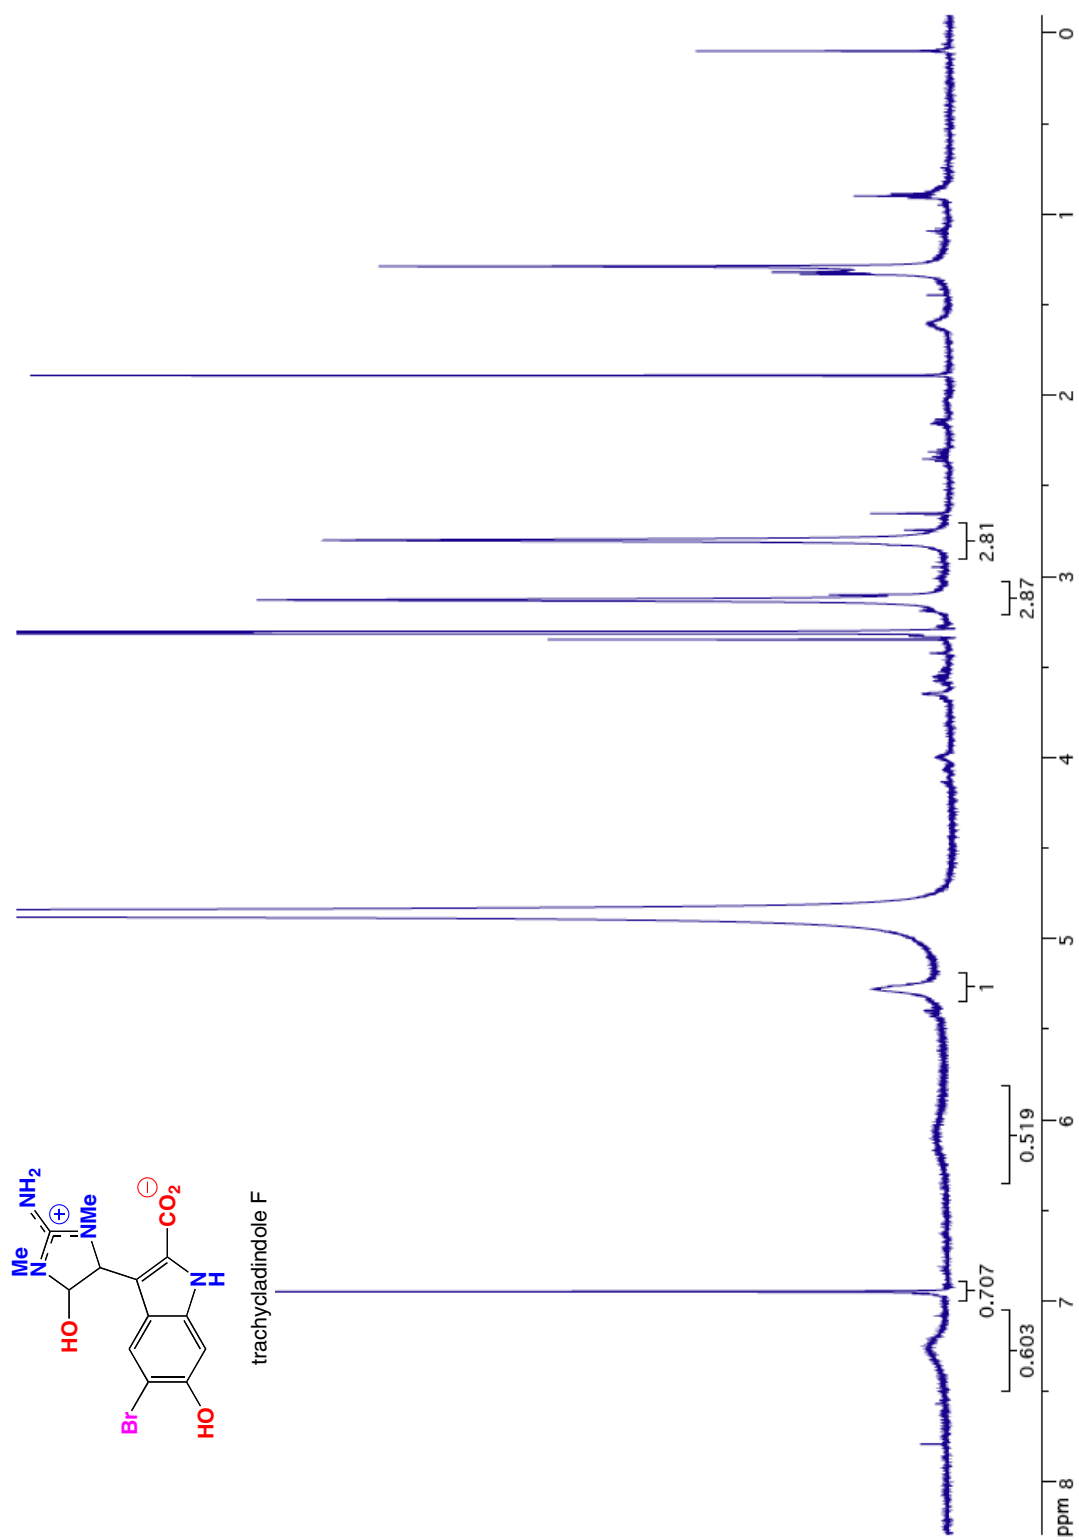

Figure S7  $^1\text{H}$  NMR (600MHz,  $\text{CD}_3\text{OD}$ ) for trachycladindole G (7)

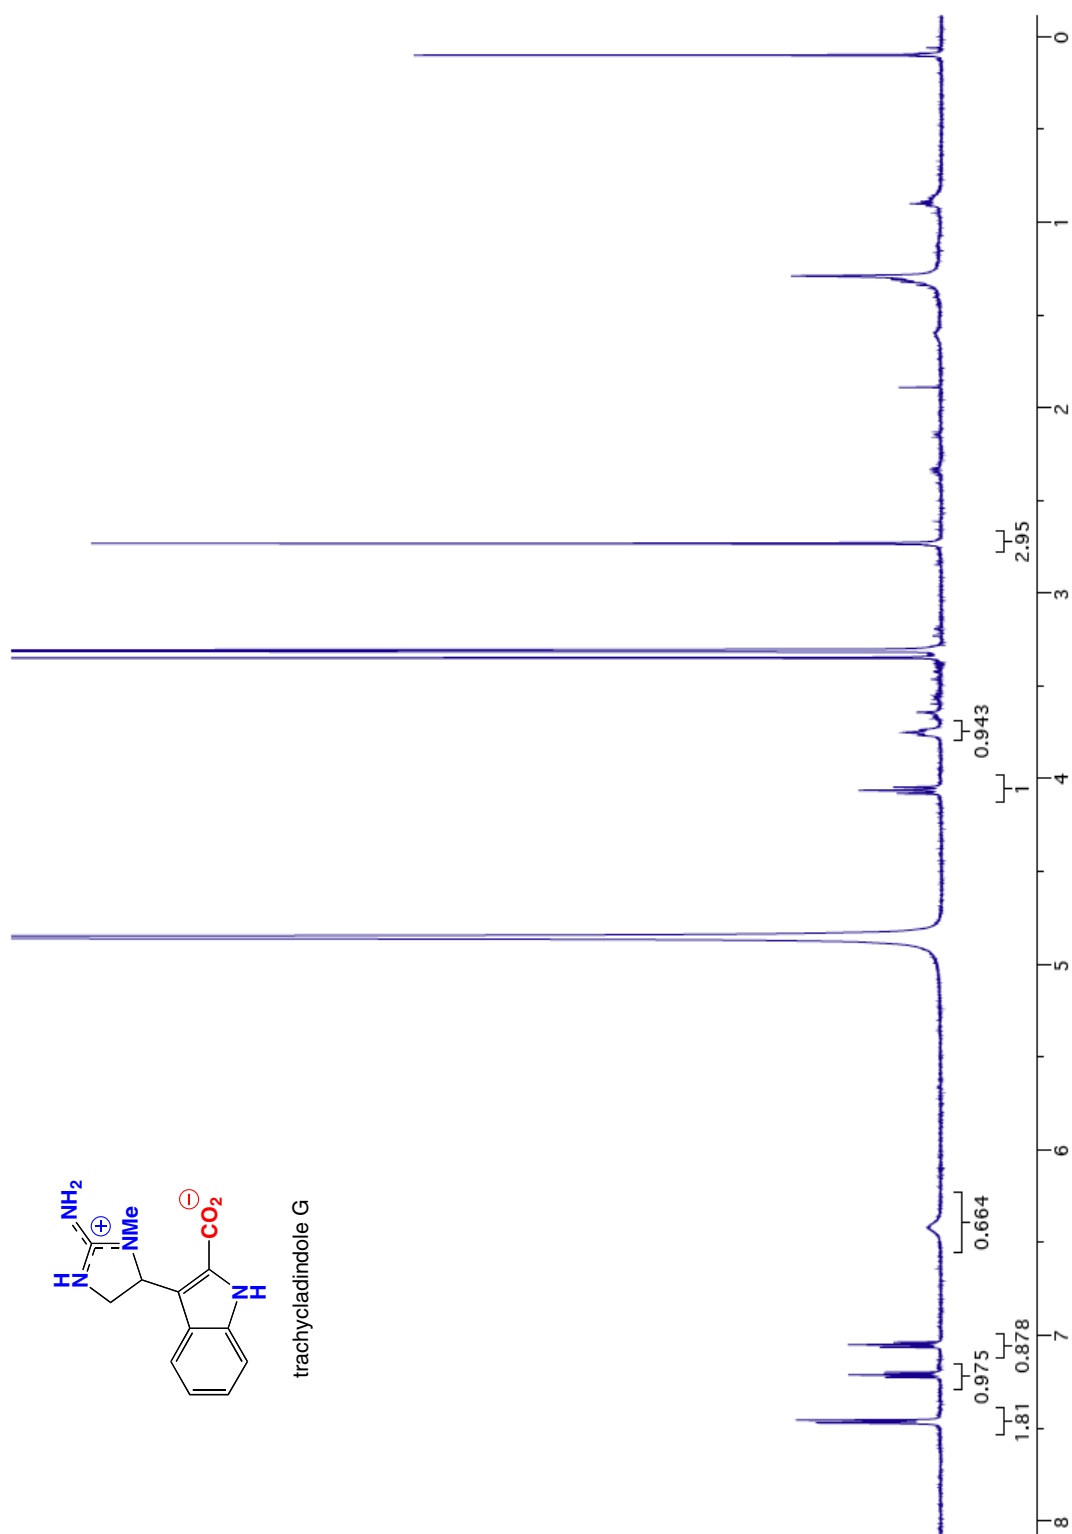

Supplement: b803455a.pdf [file b803455a.pdf]
